# Supplementary material
Source: MDPI journal article supplement (https://www.mdpi.com/2073-4441/14/14/2203)
Supplement: s1 [file s1]

**On the use of gridded data products for trend assessment  
and aridity classification in a Mediterranean context:  
the case of the Apulia region**

***SUPPLEMENT***

My et al.

---

**Table S1.** Meteorological stations considered in the study.

| Station                | Longitude<br>[DD] | Latitude<br>[DD] | Elevation<br>[m a.s.l.] | RR | Tm, TX, TN |
|------------------------|-------------------|------------------|-------------------------|----|------------|
| Adelfia                | 16.8666           | 41.0003          | 153                     | x  |            |
| Alberona               | 15.1234           | 41.4309          | 711                     | x  |            |
| Altamura               | 16.5534           | 40.8231          | 458                     | x  | x          |
| Andria                 | 16.2942           | 41.2205          | 162                     | x  | x          |
| Ascoli Satriano        | 15.5646           | 41.2012          | 435                     | x  | x          |
| Bari Presidenza        | 16.8820           | 41.1198          | 17                      | x  |            |
| Bari Idrografico       | 16.8820           | 41.1198          | 20                      |    | x          |
| Barletta               | 16.2748           | 41.3134          | 30                      | x  | x          |
| Biccari                | 15.1900           | 41.3920          | 590                     | x  |            |
| Bisceglie              | 16.4968           | 41.2382          | 30                      | x  |            |
| Bitonto                | 16.6941           | 41.1091          | 126                     | x  |            |
| Borgo Libertà          | 15.7156           | 41.1889          | 235                     | x  |            |
| Bosco Umbra            | 15.7136           | 41.8170          | 780                     | x  | x          |
| Bovino                 | 15.3375           | 41.2450          | 596                     | x  |            |
| Brindisi               | 17.9269           | 40.4781          | 22                      | x  | x          |
| Cagnano Varano         | 15.7696           | 41.8262          | 167                     | x  | x          |
| Canosa di Puglia       | 16.0620           | 41.2240          | 116                     | x  | x          |
| Casamassima            | 16.9180           | 40.9540          | 229                     | x  | x          |
| Cassano Murge          | 16.7709           | 40.8879          | 380                     | x  |            |
| Castel del Monte       | 16.2739           | 41.0785          | 470                     | x  |            |
| Castellana Grotte      | 17.1654           | 40.8815          | 300                     | x  | x          |
| Castellaneta           | 16.9323           | 40.6289          | 236                     | x  | x          |
| Castelluccio dei Sauri | 15.4762           | 41.3027          | 210                     | x  |            |
| Ceglie Messapica       | 17.5182           | 40.6452          | 312                     | x  |            |
| Cerignola              | 15.9050           | 41.2634          | 134                     | x  | x          |
| Conversano             | 17.1141           | 40.9632          | 212                     | x  |            |
| Copertino              | 18.0516           | 40.2684          | 34                      | x  |            |
| Corato                 | 16.4133           | 41.1528          | 249                     | x  |            |
| Crispiano              | 17.2358           | 40.5990          | 265                     | x  | x          |
| Fasano                 | 17.3583           | 40.8380          | 118                     | x  | x          |
| Foggia Osservatorio    | 15.5427           | 41.4607          | 94                      | x  | x          |
| Fonte Rosa             | 15.7743           | 41.4343          | 25                      | x  |            |
| Galatina               | 18.1715           | 40.1720          | 73                      | x  |            |
| Gallipoli              | 17.9945           | 40.0545          | 31                      | x  |            |
| Ginosa                 | 16.7575           | 40.5768          | 254                     | x  |            |
| Ginosa Marina          | 16.8844           | 40.4266          | 15                      | x  | x          |
| Gioia del Colle        | 16.9231           | 40.8005          | 377                     | x  | x          |
| Grottaglie             | 17.4414           | 40.5393          | 165                     | x  | x          |
| Grumo Appula           | 16.7104           | 41.0117          | 202                     | x  |            |
| Latiano                | 17.7098           | 40.5486          | 114                     | x  | x          |
| Lecce                  | 18.1675           | 40.3583          | 51                      | x  | x          |
| Lesina                 | 15.3532           | 41.8622          | 17                      | x  | x          |
| Lizzano                | 17.4487           | 40.3874          | 71                      | x  | x          |
| Locorotondo            | 17.3383           | 40.7534          | 397                     | x  | x          |
| Lucera                 | 15.3357           | 41.5107          | 224                     | x  | x          |
| Maglie                 | 18.2936           | 40.1190          | 102                     | x  | x          |
| Manduria               | 17.6352           | 40.3980          | 79                      | x  | x          |
| Manfredonia            | 15.8802           | 41.5831          | 2                       | x  | x          |
| Massafra               | 17.1084           | 40.5755          | 113                     | x  | x          |
| Masseria Monteruga     | 17.8410           | 40.3523          | 92                      | x  |            |
| Masseria S.Chiera      | 16.1344           | 41.3364          | 10                      | x  |            |
| Mercadante             | 16.7006           | 40.8897          | 395                     | x  | x          |

|                            |         |         |     |   |   |
|----------------------------|---------|---------|-----|---|---|
| Minervino di Lecce         | 18.4196 | 40.0913 | 103 | x |   |
| Minervino Murge            | 16.0840 | 41.0750 | 502 | x |   |
| Monteleone di Puglia       | 15.2587 | 41.1638 | 828 | x |   |
| Nardò                      | 18.0338 | 40.1728 | 54  | x | x |
| Noci                       | 17.1229 | 40.7953 | 423 | x |   |
| Novoli                     | 18.0512 | 40.3781 | 51  | x |   |
| Ortanova                   | 15.7068 | 41.3258 | 84  | x |   |
| Orsara di Puglia           | 15.2665 | 41.2804 | 689 | x |   |
| Ostuni                     | 17.5779 | 40.7257 | 115 | x | x |
| Otranto                    | 18.4885 | 40.1438 | 27  | x | x |
| Pietramontecorvino         | 15.1289 | 41.5434 | 464 | x | x |
| Polignano a Mare           | 17.2190 | 40.9912 | 50  | x | x |
| Presicce                   | 18.2670 | 39.8966 | 105 | x | x |
| Rocchetta S. Antonio       | 15.4655 | 41.1050 | 679 | x |   |
| Rocchetta S. Antonio Scalo | 15.5493 | 41.0788 | 220 | x |   |
| Ruvo di Puglia             | 16.4835 | 41.1136 | 274 | x | x |
| San Giorgio Jonico         | 17.3822 | 40.4578 | 86  | x | x |
| San Giovanni Rotondo       | 15.7199 | 41.7067 | 627 | x | x |
| San Marco in Lamis         | 15.6361 | 41.7102 | 564 | x |   |
| SanNicandroGarganico       | 15.5625 | 41.8371 | 228 | x |   |
| San Pancrazio              | 17.8398 | 40.4185 | 69  | x |   |
| San Pietro Vernotico       | 18.0015 | 40.4806 | 49  | x | x |
| San Severo                 | 15.3838 | 41.6928 | 99  | x | x |
| Sant'Agata                 | 15.3813 | 41.1492 | 791 | x |   |
| Spinazzola                 | 16.0970 | 40.9616 | 458 | x |   |
| Taranto                    | 17.2504 | 40.4643 | 27  | x | x |
| Taviano                    | 18.0888 | 39.9818 | 65  | x | x |
| Torremaggiore              | 15.2921 | 41.6894 | 184 | x |   |
| Troia                      | 15.3096 | 41.3615 | 436 | x |   |
| Turi                       | 17.0224 | 40.9205 | 268 | x |   |
| Vico del Gargano           | 15.9583 | 41.8912 | 450 | x |   |
| Vieste                     | 16.1752 | 41.8800 | 33  | x | x |
| Vignacastisi               | 18.4088 | 40.0118 | 99  | x | x |

---

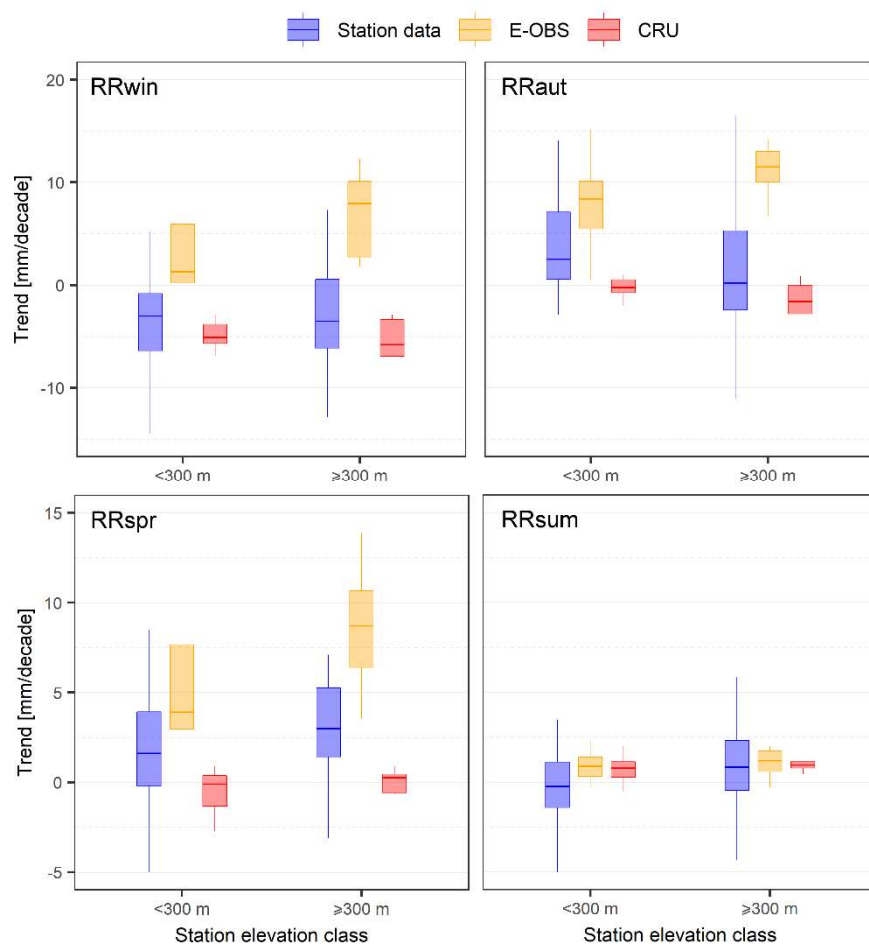

**Figure S1.** Calculated trend rates for seasonal precipitation using the three considered databases.

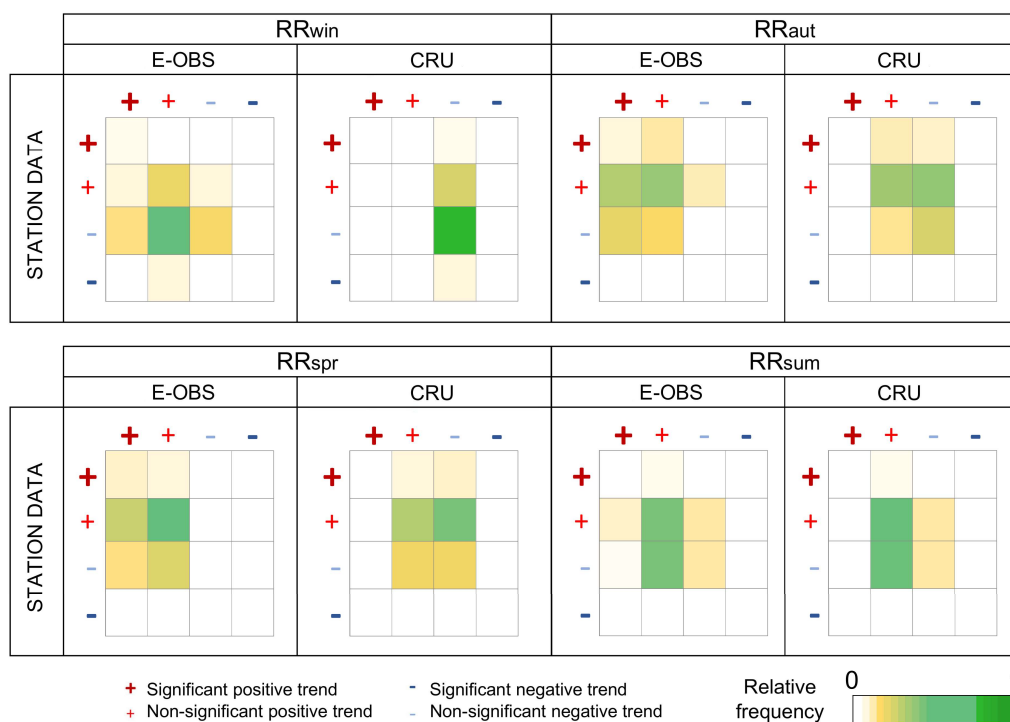

**Figure S2.** Normalized contingency matrices for detected trend sign for seasonal precipitation using the three considered databases.

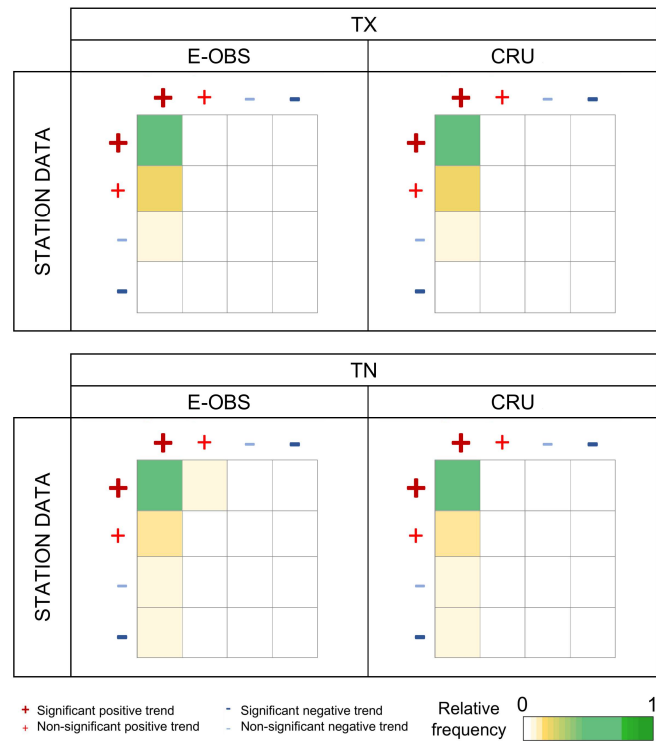

**Figure S3.** Normalized contingency matrices for detected trend signs for annual maximum (TX) and minimum (TN) temperatures using the three considered databases.

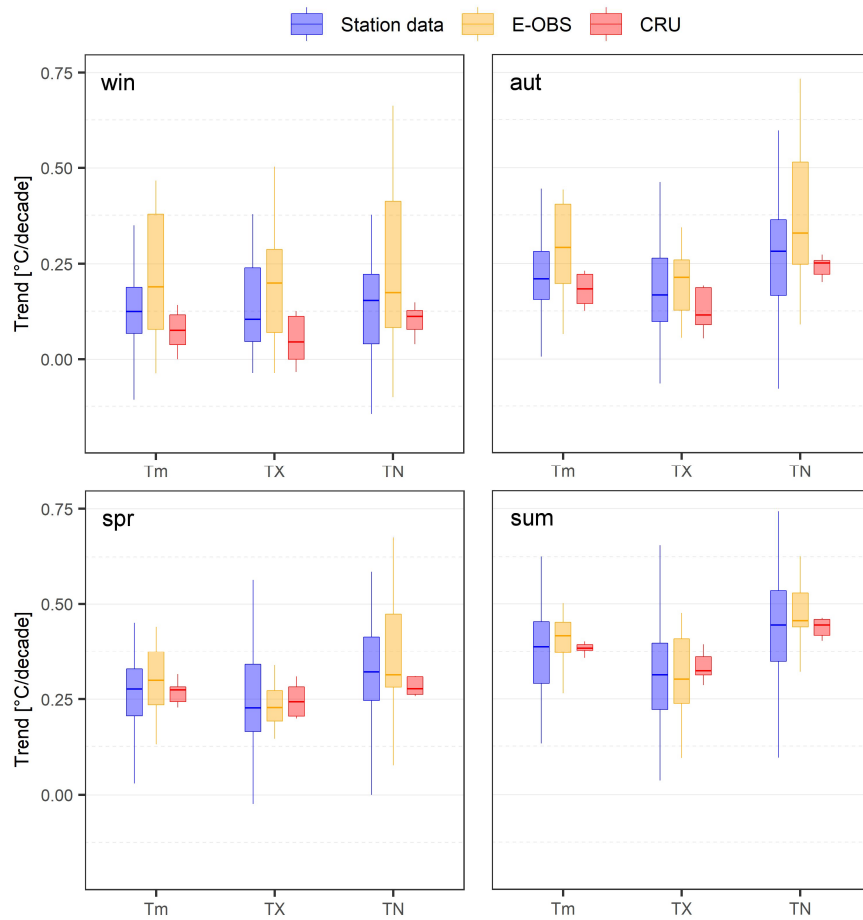

**Figure S4.** Calculated trend rates for seasonal mean (Tm), maximum (TX) and minimum (TN) temperatures using the three considered databases.

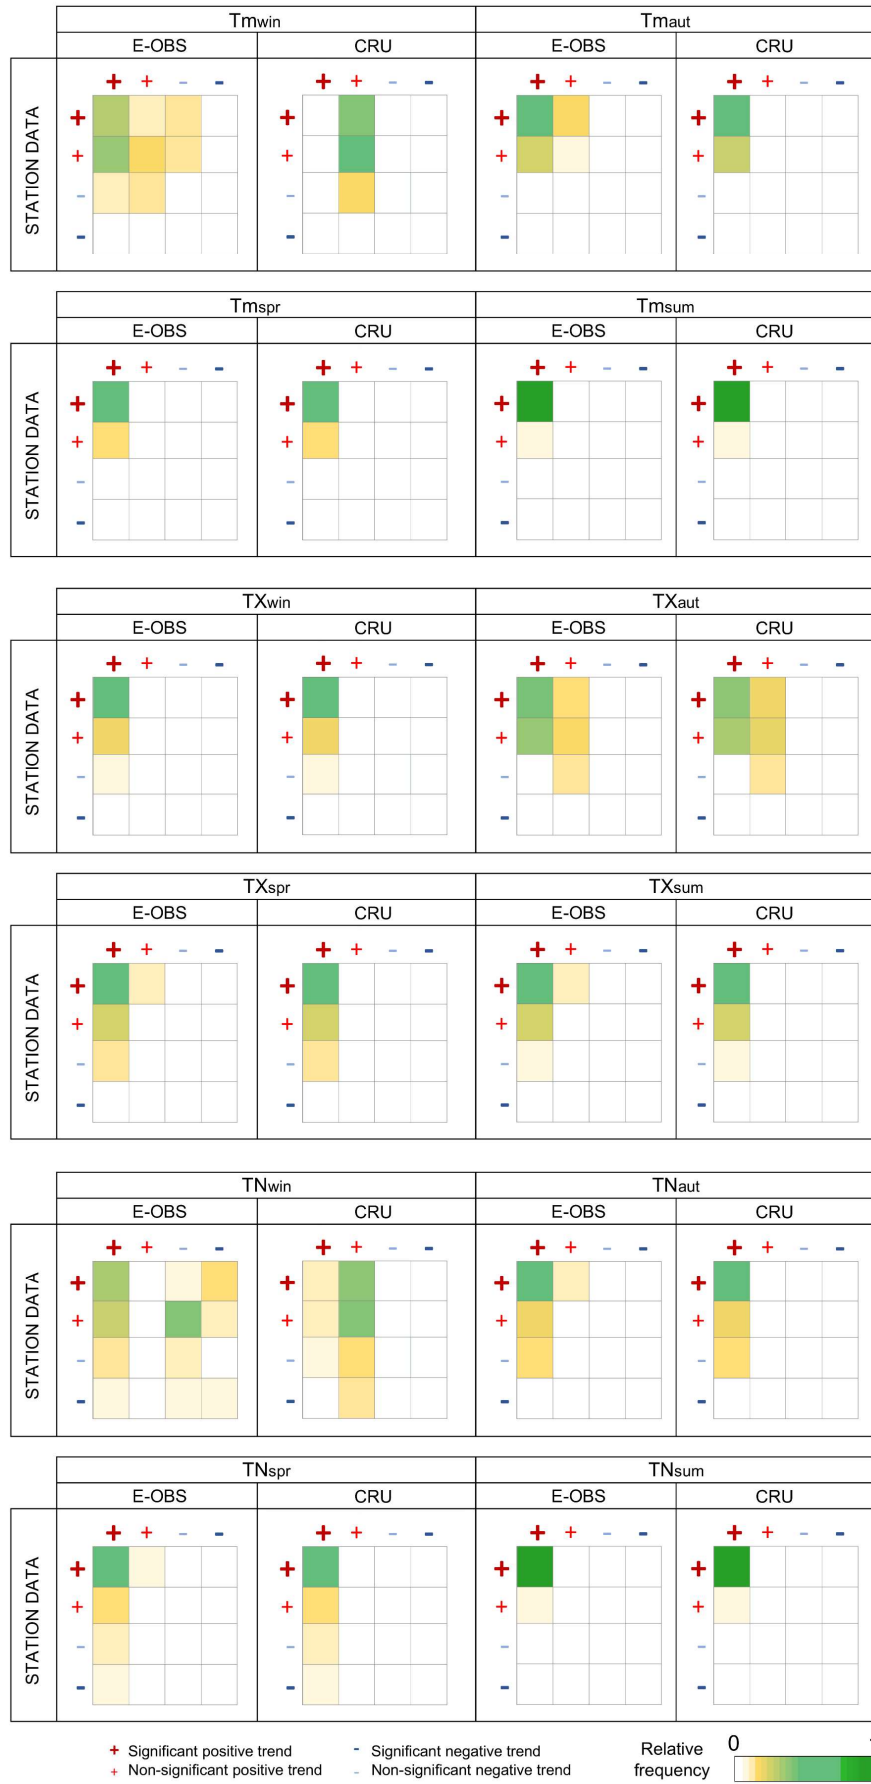

**Figure S5.** Normalized contingency matrices for detected trend signs for seasonal mean (Tm), maximum (TX) and minimum (TN) temperatures using the three considered databases.
